# Supplementary material for: Zooplankton biodiversity and temporal dynamics (2005–2015) in a coastal station in western Portugal (Northeastern Atlantic Ocean)
Source: PeerJ journal article supplement (doi:10.7717/peerj.16387), 2023-11-21
Supplement: FigS1.pdf [file FigS1.pdf]

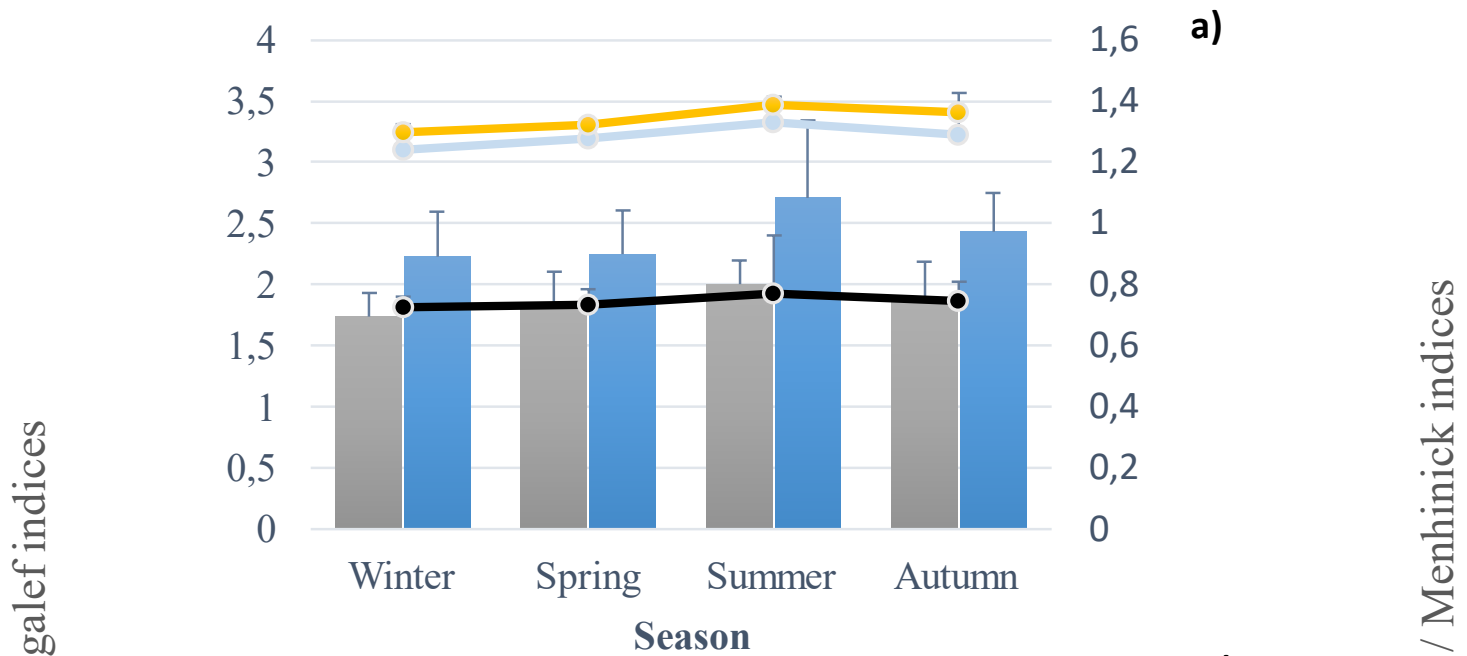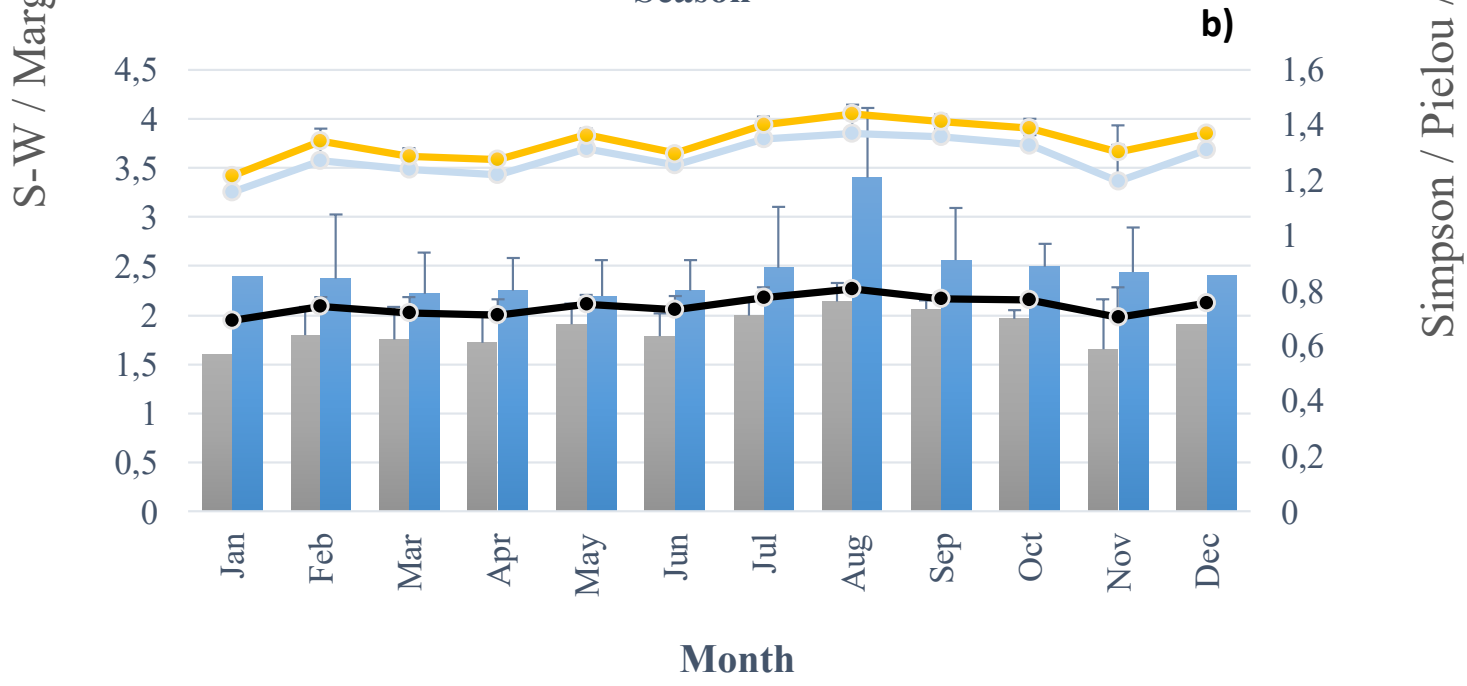

Shannon-Wiener
  Margalef
  Simpson
  Pielou
  Menhinick

Simpson / Pielou / Menhinick indices
