# Supplementary material for: Zooplankton biodiversity and temporal dynamics (2005–2015) in a coastal station in western Portugal (Northeastern Atlantic Ocean)
Source: PeerJ journal article supplement (doi:10.7717/peerj.16387), 2023-11-21

### a) Time-series, All taxa

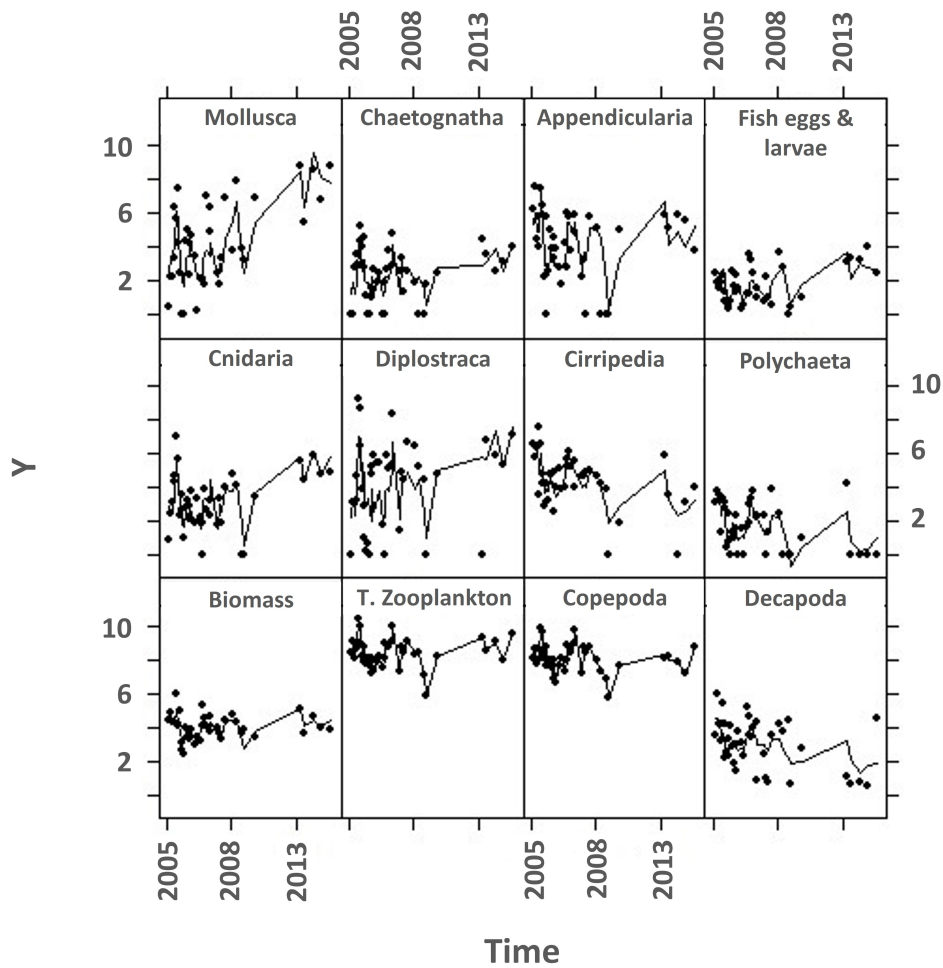

### b) Copepoda

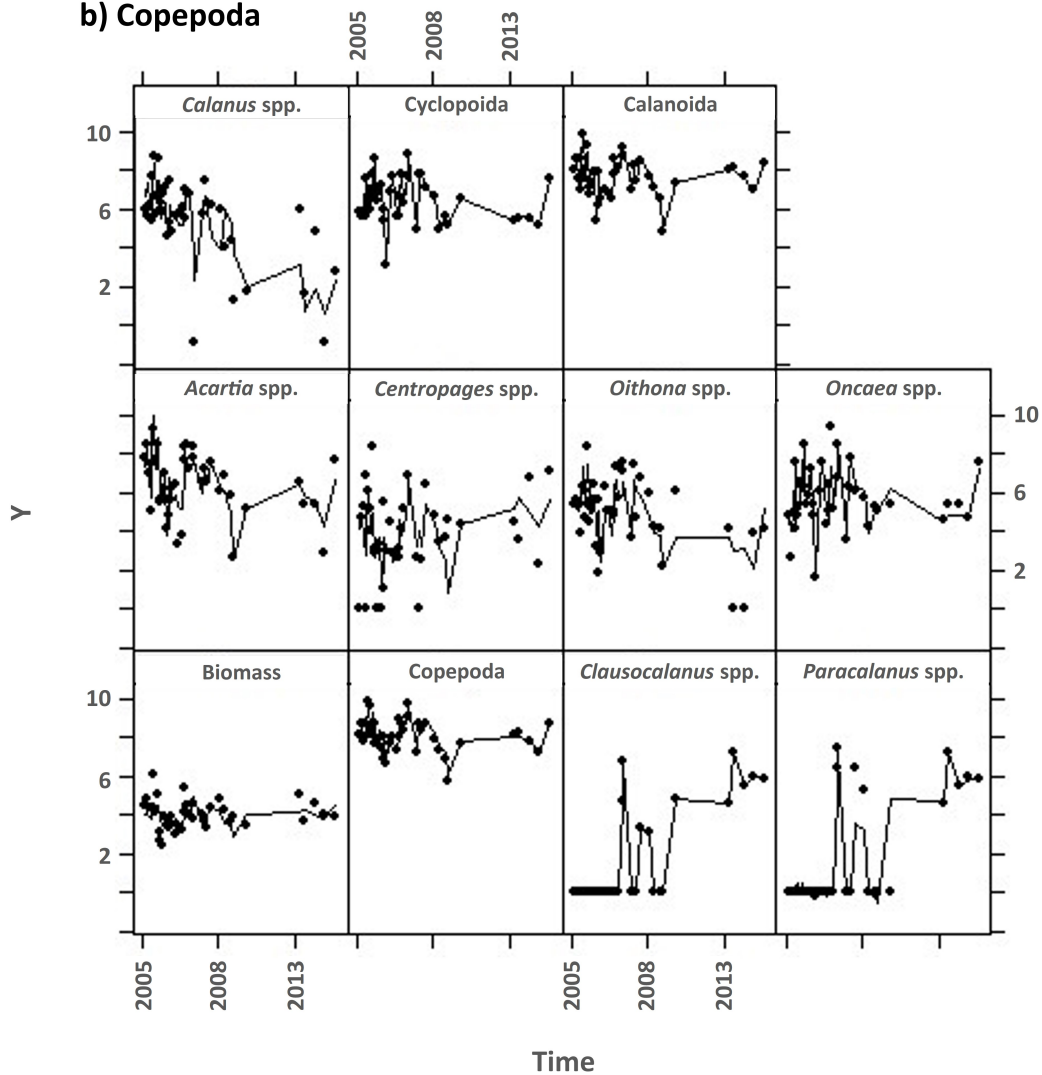

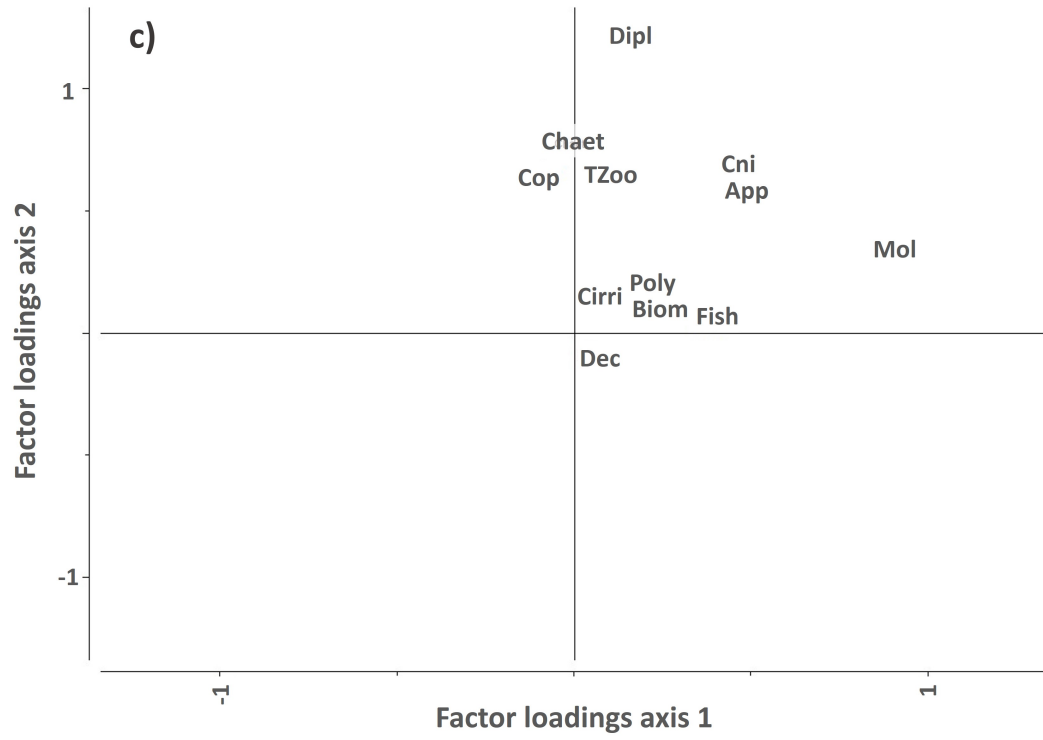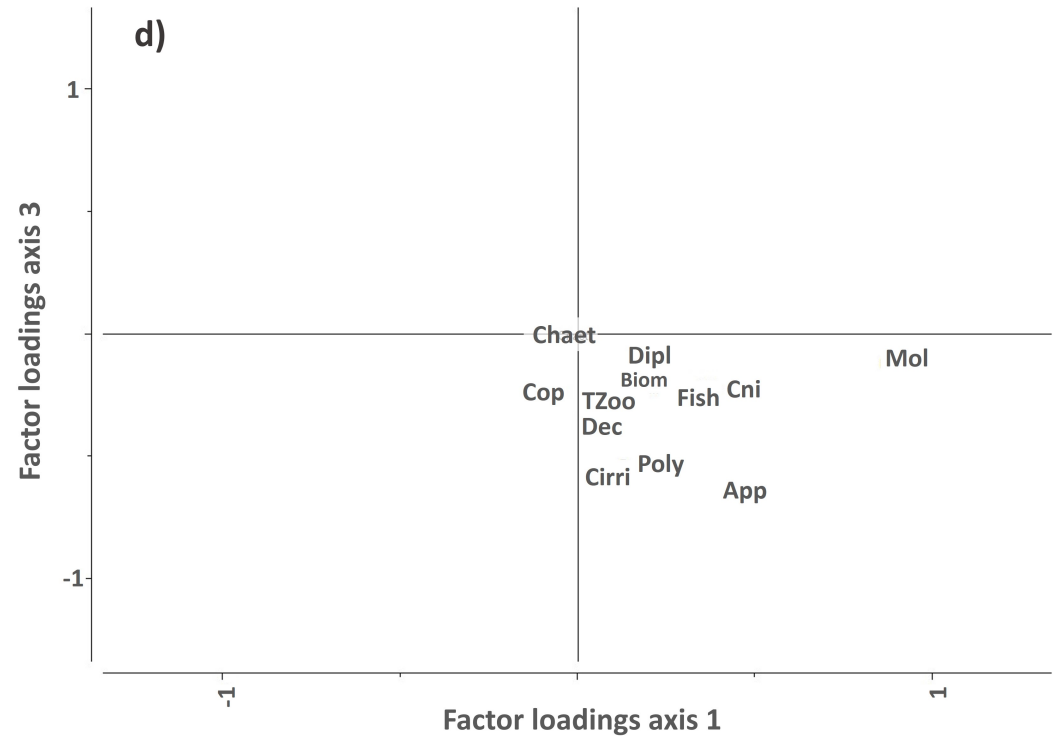

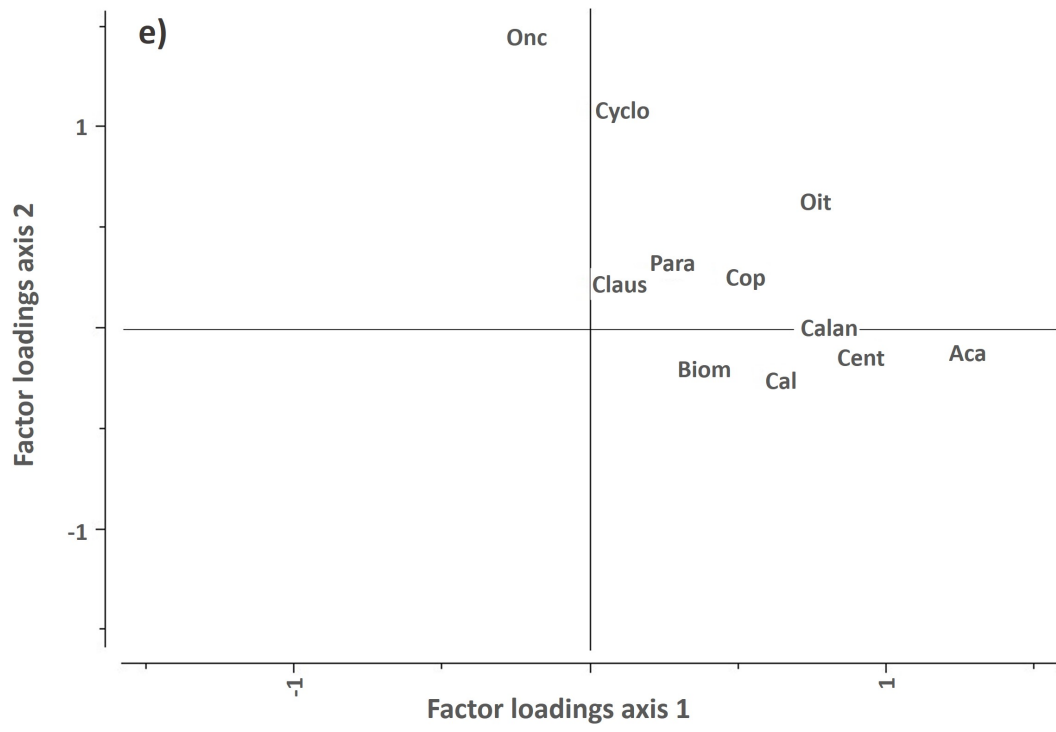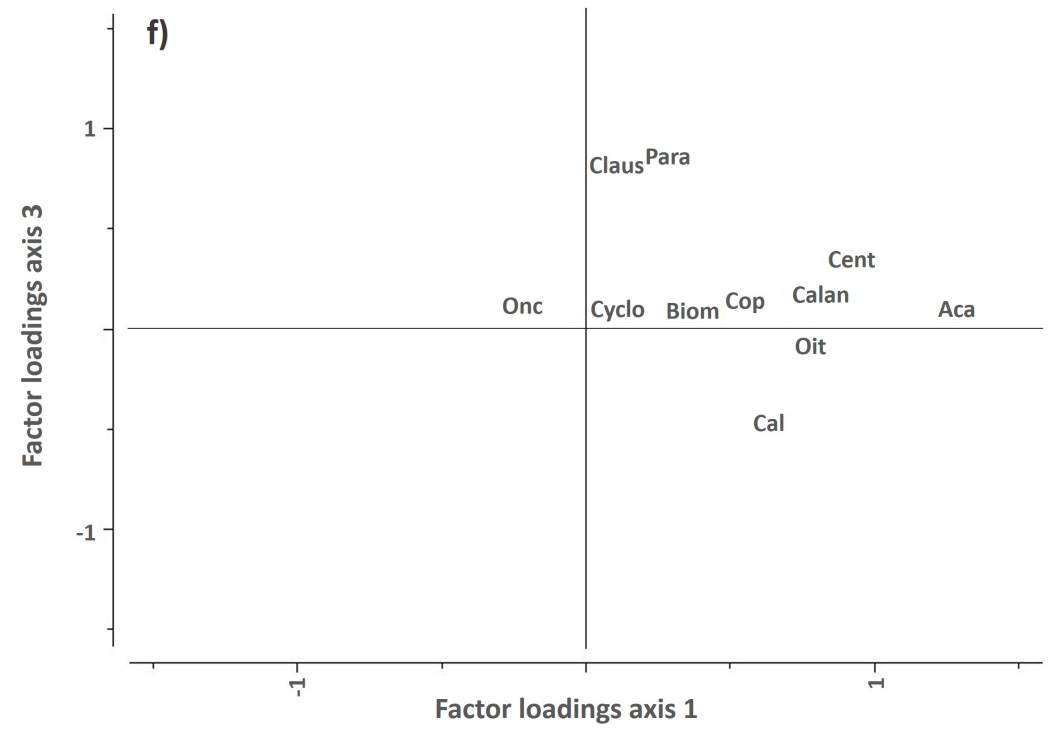

Supplement: FigS2_new.pdf [file FigS2_new.pdf]
