# Supplementary material for: Zooplankton biodiversity and temporal dynamics (2005–2015) in a coastal station in western Portugal (Northeastern Atlantic Ocean)
Source: PeerJ journal article supplement (doi:10.7717/peerj.16387), 2023-11-21
Supplement: Table_SIV.pdf [file Table_SIV.pdf]

**Table SI** Seasonal values of frequency of occurrence (F) and mean abundance (Ab; ind m<sup>-3</sup> ± SD) for the different taxa identified in the entire period of 2005 to 2015.

| Taxa                           | Winter |                 | Spring |                 | Summer |                 | Autumn |                 |
|--------------------------------|--------|-----------------|--------|-----------------|--------|-----------------|--------|-----------------|
|                                | F (%)  | Ab ± SD         | F (%)  | Ab ± SD         | F (%)  | Ab ± SD         | F (%)  | Ab ± SD         |
| RADIOZOA                       | -      | -               | -      | -               | 100    | 0.01 ± 0.03     | -      | -               |
| FORAMINIFERA n. id.            | -      | -               | 46.4   | 4.2 ± 14        | 5.9    | 1.1 ± 3.6       | 47.7   | 7.7 ± 18.2      |
| <i>Globigerina</i> spp.        | -      | -               | -      | -               | 100    | 1.8 ± 5.7       | -      | -               |
| CNIDARIA                       |        |                 |        |                 |        |                 |        |                 |
| Hydromedusae n. id.            | 0.9    | 2.3 ± 4.1       | 16     | 11.9 ± 24.4     | 69.1   | 108.3 ± 272.2   | 14.1   | 18.4 ± 51       |
| Siphonophorae n. id.           | 0.6    | 2.6 ± 3.1       | 37.1   | 44.2 ± 82.1     | 38.7   | 96.8 ± 91.9     | 23.5   | 48.9 ± 82.5     |
| CTENOPHORA                     | -      | -               | 11.3   | 0.2 ± 0.9       | 88.7   | 3.1 ± 9.7       | -      | -               |
| DIPLOSTRACA (Cladocera)        |        |                 |        |                 |        |                 |        |                 |
| <i>Podon</i> spp.              | 0.2    | 1.2 ± 2         | 37.5   | 65.4 ± 94.3     | 38.9   | 142.4 ± 200.7   | 23.5   | 71.8 ± 207.6    |
| <i>Evdadne</i> spp.            | 0.2    | 4.1 ± 6.2       | 20     | 150.8 ± 283.4   | 69.2   | 1092.5 ± 2892.8 | 10.6   | 140 ± 247.2     |
| <i>Penilia</i> spp.            | -      | -               | 5.6    | 44.1 ± 179.8    | 5.8    | 95.6 ± 160      | 88.7   | 1226.7 ± 2692   |
| CIRRIPEDIA                     |        |                 |        |                 |        |                 |        |                 |
| Cirripedia (nauplius)          | 16.8   | 268.5 ± 285.3   | 58.5   | 267.4 ± 448.8   | 16.5   | 158.1 ± 194.7   | 8.3    | 66.4 ± 65.8     |
| Cirripedia (cyprids)           | 6.7    | 19 ± 28.2       | 75.2   | 60.8 ± 97.2     | 17.2   | 29.2 ± 56.4     | 0.9    | 1.3 ± 3.3       |
| COPEPODA                       |        |                 |        |                 |        |                 |        |                 |
| Copepoda (egg)                 | -      | -               | 46.6   | 1.8 ± 8.2       | -      | -               | 53.4   | 3.6 ± 8.7       |
| Copepoda (nauplius)            | 10.6   | 158.7 ± 217.3   | 74.4   | 316.8 ± 670     | 10     | 89.3 ± 78.5     | 5      | 37.1 ± 77.5     |
| Calanoida (copepodite)         | -      | -               | 11     | 35.8 ± 164.3    | 46.8   | 318.9 ± 514.6   | 42.2   | 239.8 ± 530.7   |
| <i>Calanus</i> spp.            | 8.2    | 657.3 ± 315.1   | 33.4   | 761.1 ± 832.1   | 26.9   | 1285.3 ± 2152   | 31.5   | 1256.5 ± 3571.9 |
| <i>Calanus helgolandicus</i>   | 1.6    | 13.6 ± 25.3     | 79.2   | 190.9 ± 348.1   | 16.2   | 82 ± 175.5      | 2.9    | 12.4 ± 22.6     |
| <i>Calanoides carinatus</i>    | -      | -               | 86.5   | 20.8 ± 79.2     | 13.5   | 6.8 ± 21.5      | -      | -               |
| <i>Mesocalanus tenuicornis</i> | -      | -               | 27.3   | 3.9 ± 12.3      | 69.6   | 21 ± 64.4       | 3.2    | 0.8 ± 2.8       |
| <i>Neocalanus gracilis</i>     | -      | -               | -      | -               | 100    | 15.2 ± 44.6     | -      | -               |
| <i>Calocalanus</i> spp.        | 8.4    | 3.7 ± 9.1       | 10.9   | 1.4 ± 3.6       | 48     | 12.7 ± 22.5     | 32.8   | 7.2 ± 21.6      |
| <i>Clausocalanus</i> spp.      | -      | -               | 16.6   | 29.8 ± 91.6     | 9.4    | 35.3 ± 57.1     | 74     | 231.9 ± 465.2   |
| <i>Paracalanus</i> spp.        | -      | -               | 12.6   | 38.2 ± 98.7     | 11.3   | 72.1 ± 194      | 76.1   | 404.3 ± 666.7   |
| <i>Eucalanus</i> spp.          | 14.1   | 6 ± 5.5         | 44     | 5.3 ± 11        | 14.5   | 3.7 ± 10.5      | 27.4   | 5.8 ± 19.4      |
| <i>Anomalocera patersoni</i>   | -      | -               | -      | -               | 100    | 3.4 ± 10.8      | -      | -               |
| <i>Metridia lucens</i>         | -      | -               | -      | -               | 62.2   | 1.1 ± 3.3       | 37.8   | 0.5 ± 1.9       |
| <i>Pleuromamma</i> spp.        | 15.6   | 0.7 ± 1.7       | 20.9   | 0.3 ± 1.2       | 51.8   | 1.4 ± 4.5       | 11.8   | 0.3 ± 0.9       |
| <i>Diaixis</i> spp.            | -      | -               | -      | -               | -      | -               | 100    | 0.4 ± 1.3       |
| <i>Acartia</i> spp.            | 14.8   | 1692.7 ± 1903.6 | 31.3   | 1020.7 ± 1021.1 | 32.80  | 2245.2 ± 3264.7 | 21.1   | 1200.4 ± 1847.9 |
| <i>Euchaeta</i> spp.           | -      | -               | -      | -               | 100    | 1.2 ± 2.5       | -      | -               |
| <i>Candacia</i> spp.           | 2      | 0.7 ± 1.7       | 41.6   | 4.1 ± 9.4       | 32     | 6.7 ± 14.1      | 24.4   | 4.2 ± 10.7      |
| <i>Pseudocalanus elongatus</i> | -      | -               | -      | -               | -      | -               | 100    | 0.8 ± 2.6       |
| <i>Pseudocalanus</i> spp.      | -      | -               | -      | -               | 100    | 0.6 ± 1.8       | -      | -               |
| <i>Centropages</i> spp.        | 1.5    | 32.9 ± 44.1     | 22.7   | 143.7 ± 321.5   | 26     | 345 ± 395.8     | 49.8   | 551.2 ± 1275.4  |
| <i>Isia clavipes</i>           | -      | -               | 42.6   | 1.5 ± 5         | 57.4   | 4.2 ± 9         | -      | -               |
| <i>Temora longicornis</i>      | 2.1    | 31.5 ± 61.5     | 63.8   | 272.4 ± 463.6   | 28.7   | 257.7 ± 332.4   | 5.4    | 40.4 ± 87.4     |
| <i>Temora stylifera</i>        | 0.1    | 0.4 ± 0.9       | 9      | 7.7 ± 21.9      | 7.8    | 14.2 ± 38.2     | 83.1   | 125.5 ± 160.3   |
| <i>Oithona</i> spp.            | 8.8    | 295.8 ± 259.7   | 28.6   | 274 ± 387.9     | 20.7   | 416 ± 433.6     | 42     | 703 ± 1348.5    |
| Harpacticoida n. id.           | 5.6    | 53.3 ± 45.4     | 66.5   | 180.8 ± 279.9   | 9.9    | 56.7 ± 42       | 18     | 85.7 ± 130.7    |
| <i>Aegisthus mucronatus</i>    | -      | -               | 100    | 0.3 ± 1.5       | -      | -               | -      | -               |
| <i>Clytemenestra</i> spp.      | 39.6   | 1.1 ± 2.7       | 33.6   | 0.3 ± 1.2       | -      | -               | 26.8   | 0.4 ± 1.3       |
| <i>Microsetella</i> spp.       | -      | -               | 34.3   | 0.8 ± 2.3       | 33.2   | 1.7 ± 5.3       | 32.5   | 1.4 ± 4.3       |
| <i>Euterpina acutifrons</i>    | 5.6    | 52.2 ± 45.8     | 67.2   | 179.4 ± 280.2   | 9.4    | 52.8 ± 40.8     | 17.8   | 83.2 ± 131.4    |
| <i>Monstrilla</i> spp.         | -      | -               | -      | -               | 100    | 0.8 ± 1.7       | -      | -               |
| <i>Corycaeus</i> spp.          | 21.8   | 62.5 ± 55.3     | 49     | 40.1 ± 45.6     | 12.5   | 21.5 ± 20       | 16.7   | 24 ± 26.3       |
| <i>Oncaea</i> spp.             | 2.3    | 156.5 ± 169.9   | 54.8   | 1084.1 ± 1390   | 7.3    | 304.2 ± 309.5   | 35.6   | 1233.4 ± 1837.9 |
| Copepoda (parasite)            | -      | -               | -      | -               | -      | -               | 100    | 0.5 ± 1.9       |
| OSTRACODA                      | 41.5   | 0.9 ± 0.8       | -      | -               | 27.8   | 0.4 ± 1.1       | 30.7   | 0.3 ± 0.7       |
| STOMATOPODA                    | -      | -               | 100    | 0.006 ± 0.03    | -      | -               | -      | -               |
| <i>Platysquilla eusebia</i>    | -      | -               | 94.2   | 0.02 ± 0.1      | 5.8    | 0.002 ± 0.007   | -      | -               |
| MYSIDA                         | -      | -               | -      | -               | 37.2   | 1.2 ± 2.1       | 62.8   | 1.7 ± 3.1       |
| AMPHIPODA                      | -      | -               | -      | -               | -      | -               | 100    | 0.1 ± 0.2       |
| ISOPODA                        | -      | -               | -      | -               | -      | -               | 100    | 0.1 ± 0.2       |
| CUMACEA                        | -      | -               | 75.7   | 0.1 ± 0.5       | -      | -               | 24.3   | 0.1 ± 0.2       |
| EUPHAUSIACEA                   |        |                 |        |                 |        |                 |        |                 |
| Euphausiacea (nauplius)        | -      | -               | 40.2   | 2.1 ± 9.8       | 57.6   | 6.4 ± 19.7      | 2.3    | 0.2 ± 0.7       |
| Euphausiacea (caliopsis)       | 6.4    | 7 ± 6.9         | 63.9   | 19.9 ± 32.1     | 21.5   | 14.1 ± 21.6     | 8.2    | 4.5 ± 7         |
| Euphausiacea (furcilia)        | 3.7    | 1.1 ± 2         | 26.3   | 2.2 ± 4.9       | 49.4   | 8.6 ± 14        | 20.6   | 3 ± 9.6         |
| DECAPODA                       |        |                 |        |                 |        |                 |        |                 |
| Dendrobranchiata               | 28.3   | 0.2 ± 0.4       | 46.8   | 0.1 ± 0.3       | 23.9   | 0.1 ± 0.1       | 1      | -               |
| Caridea                        | 19.2   | 10.8 ± 13.4     | 32.4   | 5.2 ± 5.5       | 35.5   | 12 ± 16.8       | 12.9   | 3.6 ± 4         |
| Gebiidea and Axiidea           | 5.3    | 0.1 ± 0.2       | 71.7   | 0.3 ± 0.5       | 7.6    | 0.1 ± 0.1       | 15.4   | 0.1 ± 0.2       |
| Achelata and Polychelida       | 9.5    | 0.02 ± 0.1      | 63     | 0.04 ± 0.1      | 9.3    | 0.01 ± 0.04     | 18.2   | 0.02 ± 0.03     |
| Anomura                        | 12     | 13.4 ± 22.4     | 45.4   | 14.5 ± 15.3     | 26.8   | 18 ± 32.9       | 15.7   | 8.8 ± 12.3      |
| Brachyura                      | 59.5   | 154 ± 149.1     | 23.4   | 17.3 ± 18.4     | 11.2   | 17.3 ± 21.7     | 6      | 7.7 ± 11        |
| POLYCHAETA                     | 13.4   | 16.04 ± 15.9    | 45.6   | 15.6 ± 16.2     | 29.1   | 21 ± 27.5       | 11.9   | 7.1 ± 11.4      |
| MOLLUSCA                       |        |                 |        |                 |        |                 |        |                 |
| Bivalvia (larvae)              | 0.04   | 2.1 ± 4.5       | 53.4   | 748.4 ± 1730.5  | 34.3   | 1008.1 ± 2105.9 | 12.2   | 300.1 ± 550.5   |
| Gastropoda                     | -      | -               | 38.3   | 14.1 ± 41.1     | 10.3   | 7.9 ± 25.1      | 51.5   | 33.1 ± 80.5     |
| Pteropoda                      | 12     | 2.7 ± 4         | 53.6   | 3.45 ± 7.2      | 5      | 0.7 ± 1.8       | 29.5   | 3.3 ± 8.3       |
| <i>Limacina</i> spp.           | -      | -               | -      | -               | 100    | 2.1 ± 6.7       | -      | -               |
| CHAETOGNATHA                   | 1.3    | 2.6 ± 4.6       | 21.9   | 12.9 ± 14.9     | 42.8   | 52.8 ± 55.6     | 34     | 34.9 ± 43.1     |
| ECHINODERMATA                  |        |                 |        |                 |        |                 |        |                 |
| Ophiurida                      | -      | -               | 43.6   | 0.4 ± 1.5       | -      | -               | 56.4   | 0.9 ± 3.2       |
| Echinodermata (larvae)         | -      | -               | 31.5   | 3.2 ± 11.4      | 24.2   | 5.1 ± 16.1      | 44.3   | 7.9 ± 18.1      |
| PHRONIDA                       | -      | -               | -      | -               | 100    | 0.01 ± 0.03     | -      | -               |
| THALIACEA                      |        |                 |        |                 |        |                 |        |                 |
| Salpida                        | 1.1    | 1 ± 2.4         | 23.4   | 5.6 ± 25.7      | 75.5   | 38.3 ± 63.7     | -      | -               |
| Doliolida                      | 0.9    | 1.4 ± 3.5       | 43.8   | 18.6 ± 74.5     | 0.7    | 0.6 ± 2         | 54.5   | 40.5 ± 61.3     |
| APPENDICULARIA                 |        |                 |        |                 |        |                 |        |                 |
| <i>Okopteura</i> spp.          | 21     | 418.2 ± 732.5   | 28.8   | 163.5 ± 194.6   | 28.3   | 337.8 ± 480.4   | 21.9   | 217.4 ± 287.3   |
| <i>Fritillaria</i> spp.        | 11     | 16.6 ± 24.2     | 30.8   | 13.2 ± 22.7     | 52.9   | 47.7 ± 51.1     | 5.2    | 3.9 ± 7.5       |
| Fish eggs                      | 4.6    | 3.5 ± 3         | 72.2   | 15.3 ± 22.9     | 7.7    | 3.4 ± 3.6       | 15.5   | 5.8 ± 14.6      |
| Fish larvae                    | 7.5    | 0.9 ± 1         | 34.7   | 1.2 ± 2.8       | 24.3   | 1.8 ± 3.4       | 33.5   | 2.1 ± 5.1       |
| Fish juveniles                 | 100    | 0.002 ± 0.005   | -      | -               | -      | -               | -      | -               |
