# Supplementary material for: Zooplankton biodiversity and temporal dynamics (2005–2015) in a coastal station in western Portugal (Northeastern Atlantic Ocean)
Source: PeerJ journal article supplement (doi:10.7717/peerj.16387), 2023-11-21
Supplement: TableSI.pdf [file TableSI.pdf]

|                           | Mann-Kendall |                  |        |                  | Lomb-Scargle periodogram |         |                |         |
|---------------------------|--------------|------------------|--------|------------------|--------------------------|---------|----------------|---------|
|                           | Month        |                  | Season |                  | Month                    |         | Season         |         |
|                           | Z            | p-value          | Z      | p-value          | Peak frequency           | p-value | Peak frequency | p-value |
| Tot. Zooplankton          | -            | -                | 0.07   | 0.9              | 0.06                     | 0.4     | 0.46           | 0.9     |
| Copepoda                  | -1,04        | 0.3              | -1.02  | 0.3              | 0.06                     | 0.4     | 0.08           | 0.96    |
| Decapoda                  | -            | <b>0.04</b>      | -2.3   | <b>0.02</b>      | 0.5                      | 0.85    | 0.5            | 0.78    |
| Cnidaria                  | 0.9          | 0.4              | 1.2    | 0.2              | 0.1                      | 0.97    | 0.04           | 0.7     |
| Diplostraca               | 1.4          | 0.17             | 0.07   | 0.94             | 0.4                      | 0.99    | 0.2            | 0.97    |
| Cirripedia                | -2,07        | <b>0.04</b>      | -2.85  | <b>&lt; 0.01</b> | 0.03                     | 0.98    | 0.3            | 0.98    |
| Euphausiacea              | 0.89         | 0.37             | 0.92   | 0.36             | 0.5                      | 0.7     | 0.5            | 0.4     |
| Polychaeta                | -2.47        | <b>0.01</b>      | -2.4   | <b>0.02</b>      | 0.2                      | 0.9     | 0.2            | 0.7     |
| Mollusca                  | 2.8          | <b>&lt; 0.01</b> | 2.3    | <b>0.02</b>      | 0.5                      | 0.1     | 0.4            | 0.8     |
| Chaetognatha              | 0.43         | 0.7              | 0.74   | 0.46             | 0.06                     | 0.3     | 0.2            | 0.7     |
| Appendicularia            | -1.3         | 0.17             | -0.27  | 0.8              | 0.03                     | 0.99    | 0.17           | 0.9     |
| Fish larvae & eggs        | -0.9         | 0.4              | 0.4    | 0.7              | 0.03                     | 0.3     | 0.05           | 0.8     |
| <i>Centropages</i> spp.   | 0.7          | 0.5              | -0.07  | 0.94             |                          |         |                |         |
| <i>Calanus</i> spp.       | -2.96        | <b>0.003</b>     | -2.78  | <b>0.01</b>      |                          |         |                |         |
| <i>Clausocalanus</i> spp. | 4.2          | <b>&lt; 0.01</b> | 3.5    | <b>&lt; 0.01</b> |                          |         |                |         |
| <i>Paracalanus</i> spp.   | 3.6          | <b>&lt; 0.01</b> | 2.7    | <b>&lt; 0.01</b> |                          |         |                |         |
| <i>Oithona</i> spp.       | -1,5         | 0.14             | -1.7   | 0.08             |                          |         |                |         |
| <i>Acartia</i> spp.       | -1.7         | 0.09             | -1.8   | 0.08             |                          |         |                |         |
| <i>Oncaea</i> spp.        | 0.2          | 0.8              | -1.1   | 0.3              |                          |         |                |         |
