# Supplementary material for: Zooplankton biodiversity and temporal dynamics (2005–2015) in a coastal station in western Portugal (Northeastern Atlantic Ocean)
Source: PeerJ journal article supplement (doi:10.7717/peerj.16387), 2023-11-21
Supplement: TableSII.pdf [file TableSII.pdf]

|                     |        | Levene test | 1-way ANOVA |         | Tukey                                           | Kruskal-Wallis |         | Mann-Whitney                                         |
|---------------------|--------|-------------|-------------|---------|-------------------------------------------------|----------------|---------|------------------------------------------------------|
|                     |        | p-value     | F           | p-value | p-value                                         | H              | p-value | p-value                                              |
| Tot. zooplankton    | Month  | 0.01        | 1.2         | 0.4     | -                                               | -              | -       | -                                                    |
|                     | Season | 0.05        | -           | -       | -                                               | 7.9            | 0.04    | < 0.05 for Au vs Su                                  |
|                     | Year   | 0.2         | -           | -       | -                                               | 16.9           | 0.03    | < 0.05 for 2005 vs 2006, 2009 and 2006 vs 2007       |
|                     | Period | 0.6         | -           | -       | -                                               | 3.3            | 0.07    | -                                                    |
| Zooplankton biomass | Month  | < 0.01      | 1.6         | 0.15    | -                                               | -              | -       | -                                                    |
|                     | Season | 0.1         | -           | -       | -                                               | 3.7            | 0.3     | -                                                    |
|                     | Year   | 0.4         | -           | -       | -                                               | 12.5           | 0.1     | -                                                    |
|                     | Period | 0.5         | -           | -       | -                                               | 2.5            | 0.1     | -                                                    |
| Copepoda            | Month  | 0.004       | 0.9         | 0.6     | -                                               | -              | -       | -                                                    |
|                     | Season | 0.04        | 2.01        | 0.1     | -                                               | -              | -       | -                                                    |
|                     | Year   | 0.2         | -           | -       | -                                               | 19.6           | 0.01    | < 0.02 for 2005 vs 2006, 2009 and 2007 vs 2006, 2009 |
|                     | Period | 0.9         | -           | -       | -                                               | 1.4            | 0.2     | -                                                    |
| Decapoda            | Month  | 0.02        | 0.7         | 0.7     | -                                               | -              | -       | -                                                    |
|                     | Season | < 0.01      | 3.8         | 0.02    | < 0.03 for Wi vs Sp, Au                         | -              | -       | -                                                    |
|                     | Year   | 0.1         | -           | -       | -                                               | 16.2           | 0.04    | < 0.04 for 2005 vs 2013, 2014                        |
|                     | Period | 0.03        | 0.3         | 0.7     | -                                               | -              | -       | -                                                    |
| Cnidaria            | Month  | < 0.01      | 1.6         | 0.1     | -                                               | -              | -       | -                                                    |
|                     | Season | 0.01        | 3.3         | 0.03    | p=0.05 for Su vs Au                             | -              | -       | -                                                    |
|                     | Year   | 0.1         | -           | -       | -                                               | 13.5           | 0.1     | -                                                    |
|                     | Period | 0.04        | 2.08        | 0.2     | -                                               | -              | -       | -                                                    |
| Diplostraca         | Month  | < 0.01      | 1.04        | 0.4     | -                                               | -              | -       | -                                                    |
|                     | Season | < 0.01      | 2.2         | 0.1     | -                                               | -              | -       | -                                                    |
|                     | Year   | 0.05        | 0.4         | 0.9     | -                                               | -              | -       | -                                                    |
|                     | Period | 0.4         | -           | -       | -                                               | 0.27           | 0.6     | -                                                    |
| Cirripedia          | Month  | < 0.01      | 1.38        | 0.2     | -                                               | -              | -       | -                                                    |
|                     | Season | 0.1         | -           | -       | -                                               | 8.17           | 0.04    | < 0.01 for Au vs Sp                                  |
|                     | Year   | 0.02        | 1           | 0.5     | -                                               | -              | -       | -                                                    |
|                     | Period | 0.04        | 2.8         | 0.1     | -                                               | -              | -       | -                                                    |
| Euphausiacea        | Month  | < 0.01      | 0.6         | 0.8     | -                                               | -              | -       | -                                                    |
|                     | Season | 0.02        | 1.5         | 0.2     | -                                               | -              | -       | -                                                    |
|                     | Year   | < 0.01      | 5.04        | < 0.01  | < 0.04 for 2015 vs 2005-2010, 2014              | -              | -       | -                                                    |
|                     | Period | 0.01        | 2.8         | 0.1     | -                                               | -              | -       | -                                                    |
| Polychaeta          | Month  | 0.07        | -           | -       | -                                               | 16.5           | 0.1     | -                                                    |
|                     | Season | 0.01        | 2.5         | 0.07    | -                                               | -              | -       | -                                                    |
|                     | Year   | < 0.01      | 1.7         | 0.1     | -                                               | -              | -       | -                                                    |
|                     | Period | 0.07        | -           | -       | -                                               | 3.4            | 0.06    | -                                                    |
| Mollusca            | Month  | < 0.01      | 1.2         | 0.3     | -                                               | -              | -       | -                                                    |
|                     | Season | 0.03        | 1.2         | 0.3     | -                                               | -              | -       | -                                                    |
|                     | Year   | < 0.01      | 6.4         | < 0.01  | < 0.03 for 2013 vs 2005-2007; 2015 vs 2005-2009 | -              | -       | -                                                    |
|                     | Period | 0.01        | 2.5         | 0.1     | -                                               | -              | -       | -                                                    |
| Chaetognatha        | Month  | < 0.01      | 1.3         | 0.3     | -                                               | -              | -       | -                                                    |
|                     | Season | 0.002       | 3.1         | 0.04    | No significant comparisons                      | -              | -       | -                                                    |
|                     | Year   | 0.04        | 1.3         | 0.3     | -                                               | -              | -       | -                                                    |
|                     | Period | 0.6         | -           | -       | -                                               | 0.05           | 0.8     | -                                                    |
| Appendicularia      | Month  | 0.01        | 0.7         | 0.7     | -                                               | -              | -       | -                                                    |
|                     | Season | 0.01        | 2.6         | 0.07    | -                                               | -              | -       | -                                                    |
|                     | Year   | 0.02        | 1.3         | 0.3     | -                                               | -              | -       | -                                                    |
|                     | Period | 0.6         | -           | -       | -                                               | 1.1            | 0.3     | -                                                    |
| Fish eggs & larvae  | Month  | 0.01        | 0.5         | 0.9     | -                                               | -              | -       | -                                                    |
|                     | Season | 0.4         | -           | -       | -                                               | 10.8           | 0.01    | < 0.03 for Sp vs Su, Au                              |
|                     | Year   | < 0.01      | 25.3        | < 0.01  | < 0.01 for 2013 vs 2005-2015; 2014 vs 2005-2013 | -              | -       | -                                                    |
|                     | Period | 0.5         | -           | -       | -                                               | 4.3            | 0.04    | < 0.04 Upwelling vs Downwelling                      |

|                           | Levene test |        | 1-way ANOVA |      | Tukey<br>p-value             | Kruskal-Wallis |      | Mann-Whitney<br>p-value      |
|---------------------------|-------------|--------|-------------|------|------------------------------|----------------|------|------------------------------|
|                           | p-value     | F      | p-value     | H    |                              | p-value        |      |                              |
| <i>Clausocalanus</i> spp. | Month       | < 0.01 | 1.03        | 0.4  | -                            | -              | -    | -                            |
|                           | Season      | < 0.01 | 2.1         | 0.1  | -                            | -              | -    | -                            |
|                           | Year        | < 0.01 | 3.4         | 0.01 | < 0.03 for 2013 vs 2005-2009 | -              | -    | -                            |
|                           | Period      | < 0.01 | 3.8         | 0.06 | -                            | -              | -    | -                            |
| <i>Paracalanus</i> spp.   | Month       | < 0.01 | 1.3         | 0.3  | -                            | -              | -    | -                            |
|                           | Season      | < 0.01 | 1.8         | 0.2  | -                            | -              | -    | -                            |
|                           | Year        | < 0.01 | 1.6         | 0.2  | -                            | -              | -    | -                            |
|                           | Period      | < 0.01 | 2.5         | 0.1  | -                            | -              | -    | -                            |
| <i>Acartia</i> spp.       | Month       | < 0.01 | 0.8         | 0.7  | -                            | -              | -    | -                            |
|                           | Season      | 0.2    | -           | -    | -                            | 4.7            | 0.2  | -                            |
|                           | Year        | 0.2    | -           | -    | -                            | 17.2           | 0.03 | < 0.02 for 2006 vs 2005-2008 |
|                           | Period      | 0.8    | -           | -    | -                            | 2.4            | 0.1  | -                            |
| <i>Calanus</i> spp.       | Month       | 0.002  | 0.5         | 0.92 | -                            | -              | -    | -                            |
|                           | Season      | 0.1    | -           | -    | -                            | 3.2            | 0.4  | -                            |
|                           | Year        | 0.01   | 0.95        | 0.5  | -                            | -              | -    | -                            |
|                           | Period      | 0.7    | -           | -    | -                            | 2.5            | 0.1  | -                            |
| <i>Centropages</i> spp.   | Month       | < 0.01 | 1.2         | 0.3  | -                            | -              | -    | -                            |
|                           | Season      | 0.04   | 0.9         | 0.5  | -                            | -              | -    | -                            |
|                           | Year        | 0.07   | -           | -    | -                            | 6.8            | 0.6  | -                            |
|                           | Period      | 0.3    | -           | -    | -                            | 0.2            | 0.7  | -                            |
| <i>Oithona</i> spp.       | Month       | < 0.01 | 1.1         | 0.4  | -                            | -              | -    | -                            |
|                           | Season      | 0.03   | 0.7         | 0.6  | -                            | -              | -    | -                            |
|                           | Year        | 0.2    | -           | -    | -                            | 11.6           | 0.2  | -                            |
|                           | Period      | 0.05   | 1.03        | 0.3  | -                            | -              | -    | -                            |
| <i>Oncaea</i> spp.        | Month       | 0.02   | 0.6         | 0.8  | -                            | -              | -    | -                            |
|                           | Season      | < 0.01 | 2.04        | 0.1  | -                            | -              | -    | -                            |
|                           | Year        | 0.3    | -           | -    | -                            | 5.7            | 0.7  | -                            |
|                           | Period      | 0.004  | 1.8         | 0.2  | -                            | -              | -    | -                            |
| Calanoida                 | Month       | < 0.01 | 0.9         | 0.6  | -                            | -              | -    | -                            |
|                           | Season      | 0.1    | -           | -    | -                            | 3.9            | 0.3  | -                            |
|                           | Year        | 0.1    | -           | -    | -                            | 14.2           | 0.08 | -                            |
|                           | Period      | 0.4    | -           | -    | -                            | 1.4            | 0.2  | -                            |
| Cyclopoida                | Month       | 0.03   | 0.7         | 0.7  | -                            | -              | -    | -                            |
|                           | Season      | < 0.01 | 2.03        | 0.1  | -                            | -              | -    | -                            |
|                           | Year        | 0.2    | -           | -    | -                            | 11.7           | 0.2  | -                            |
|                           | Period      | 0.003  | 2.4         | 0.1  | -                            | -              | -    | -                            |

|                                    |        | Levene test | 1-way ANOVA |         | Tukey                      | Kruskal-Wallis |         | Mann-Whitney                                                                                              |
|------------------------------------|--------|-------------|-------------|---------|----------------------------|----------------|---------|-----------------------------------------------------------------------------------------------------------|
|                                    |        | p-value     | F           | p-value | p-value                    | H              | p-value | p-value                                                                                                   |
| Shannon-Wiener diversity           | Month  | 0.3         | -           | -       | -                          | 9.6            | 0.6     | -                                                                                                         |
|                                    | Season | 0.3         | -           | -       | -                          | 4.6            | 0.2     | -                                                                                                         |
|                                    | Year   | 0.3         | -           | -       | -                          | 6.6            | 0.6     | -                                                                                                         |
|                                    | Period | 0.98        | -           | -       | -                          | 0.09           | 0.8     | -                                                                                                         |
| Simpson diversity                  | Month  | 0.2         | -           | -       | -                          | 12.4           | 0.3     | -                                                                                                         |
|                                    | Season | 0.2         | -           | -       | -                          | 4.98           | 0.2     | -                                                                                                         |
|                                    | Year   | 0.6         | -           | -       | -                          | 7.4            | 0.5     | -                                                                                                         |
|                                    | Period | 0.99        | -           | -       | -                          | 0.08           | 0.8     | -                                                                                                         |
| Pielou's Eveness                   | Month  | 0.3         | -           | -       | -                          | 8.8            | 0.6     | -                                                                                                         |
|                                    | Season | 0.5         | -           | -       | -                          | 2.9            | 0.4     | -                                                                                                         |
|                                    | Year   | 0.4         | -           | -       | -                          | 5.8            | 0.7     | -                                                                                                         |
|                                    | Period | 0.9         | -           | -       | -                          | < 0.01         | 0.99    | -                                                                                                         |
| Menhinick taxonomic richness index | Month  | 0.004       | 0.7         | 0.69    | -                          | -              | -       | -                                                                                                         |
|                                    | Season | 0.1         | -           | -       | -                          | 2.5            | 0.5     | -                                                                                                         |
|                                    | Year   | < 0.01      | 1.7         | 0.13    | -                          | -              | -       | -                                                                                                         |
|                                    | Period | 0.02        | 3.4         | 0.07    | -                          | -              | -       | -                                                                                                         |
| Margalef's species richness        | Month  | 0.4         | -           | -       | -                          | 8.7            | 0.7     | -                                                                                                         |
|                                    | Season | 0.04        | 1.6         | 0.2     | -                          | -              | -       | -                                                                                                         |
|                                    | Year   | 0.4         | -           | -       | -                          | 12             | 0.2     | -                                                                                                         |
|                                    | Period | 0.2         | -           | -       | -                          | 0.6            | 0.4     | -                                                                                                         |
| SST                                | Month  | 0.1         | -           | -       | -                          | 31.5           | < 0.01  | < 0.04 for Mar vs Jun, Jul, Sep-Nov and Apr/May vs Jun, Oct<br>< 0.04 between all seasons except Au vs Su |
|                                    | Season | 0.1         | -           | -       | -                          | 20.9           | < 0.01  |                                                                                                           |
|                                    | Year   | 0.02        | 1.2         | 0.3     | -                          | -              | -       |                                                                                                           |
|                                    | Period | 0.5         | -           | -       | -                          | 0.001          | 0.97    |                                                                                                           |
| UI                                 | Month  | 0.003       | 5.1         | < 0.01  | < 0.02 for Oct vs Mar-Sep  | -              | -       | -                                                                                                         |
|                                    | Season | 0.3         | -           | -       | -                          | 25.2           | < 0.01  | < 0.01 between all seasons                                                                                |
|                                    | Year   | 0.3         | -           | -       | -                          | 7.1            | 0.5     | -                                                                                                         |
|                                    | Period | 0.1         | -           | -       | -                          | 25.7           | < 0.01  | < 0.01 between both periods                                                                               |
| Chl                                | Month  | 0.07        | -           | -       | -                          | 4.5            | 0.95    | -                                                                                                         |
|                                    | Season | 0.7         | -           | -       | -                          | 1.8            | 0.6     | -                                                                                                         |
|                                    | Year   | 0.6         | -           | -       | -                          | 15.1           | 0.06    | -                                                                                                         |
|                                    | Period | 0.9         | -           | -       | -                          | < 0.01         | 0.99    | -                                                                                                         |
| Pp                                 | Month  | < 0.01      | 2.7         | 0.02    | < 0.04 for Nov vs Jun, Jul | -              | -       | -                                                                                                         |
|                                    | Season | < 0.01      | 8.9         | < 0.01  | < 0.01 for Au vs Sp, Su    | -              | -       | -                                                                                                         |
|                                    | Year   | 0.2         | -           | -       | -                          | 9.9            | 0.3     | -                                                                                                         |
|                                    | Period | < 0.01      | 26.6        | < 0.01  | < 0.01                     | -              | -       | -                                                                                                         |
