# Supplementary material for: Zooplankton biodiversity and temporal dynamics (2005–2015) in a coastal station in western Portugal (Northeastern Atlantic Ocean)
Source: PeerJ journal article supplement (doi:10.7717/peerj.16387), 2023-11-21
Supplement: TableSIII.pdf [file TableSIII.pdf]

**Environmental parameters**

**Eigenvalue % Total variance**

|            |      |       |
|------------|------|-------|
| <b>PC1</b> | 1.6  | 40.02 |
| <b>PC2</b> | 1.09 | 27.3  |
| <b>PC3</b> | 0.88 | 21.9  |
| <b>PC4</b> | 0.4  | 10.8  |

| <b>Eigenvectors</b> | <b>Factor 1</b> | <b>Factor 2</b> | <b>Factor 3</b> | <b>Factor 4</b> |
|---------------------|-----------------|-----------------|-----------------|-----------------|
| <b>SST</b>          | -0.12           | -0.8            | 0.64            | 0.13            |
| <b>Chl</b>          | -0,3            | -0.6            | -0.7            | -0.2            |
| <b>UI</b>           | 0.66            | -0.2            | -0.27           | 0.68            |
| <b>Pp</b>           | -0.68           | 0.2             | -0.06           | 0.7             |

**Month / Year**

**Eigenvalue % Total variance**

|            |     |      |
|------------|-----|------|
| <b>PC1</b> | 1.1 | 54.8 |
| <b>PC2</b> | 0.9 | 45.2 |

**Season**

**Eigenvalue % variance**

|            |     |       |
|------------|-----|-------|
| <b>PC1</b> | 8.6 | 48.02 |
| <b>PC2</b> | 3   | 16.8  |
| <b>PC3</b> | 2.4 | 13.2  |
| <b>PC4</b> | 1.9 | 10.7  |
